# Supplementary material for: Higher throughput workflow with sensitive, reliable and automatic quantification of myelination in vitro suitable for drug screening
Source: PubMed Central journal article supplement (PMC9938858; doi:10.1038/s41598-023-29333-1), 2023-02-18
Supplement: 41598_2023_29333_MOESM1_ESM.pdf [file 41598_2023_29333_MOESM1_ESM.pdf]

# Supplementary information

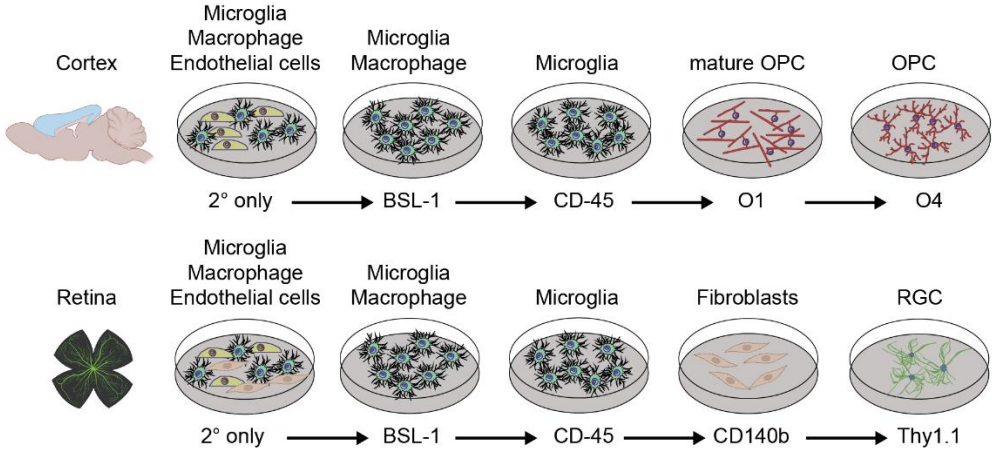

*In vitro*  
myelinating RGC-OPC  
co-cultures

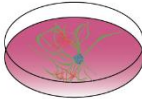

miniaturisation

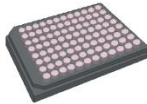

automation

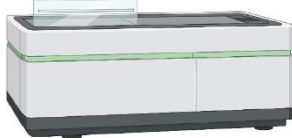

image analysis

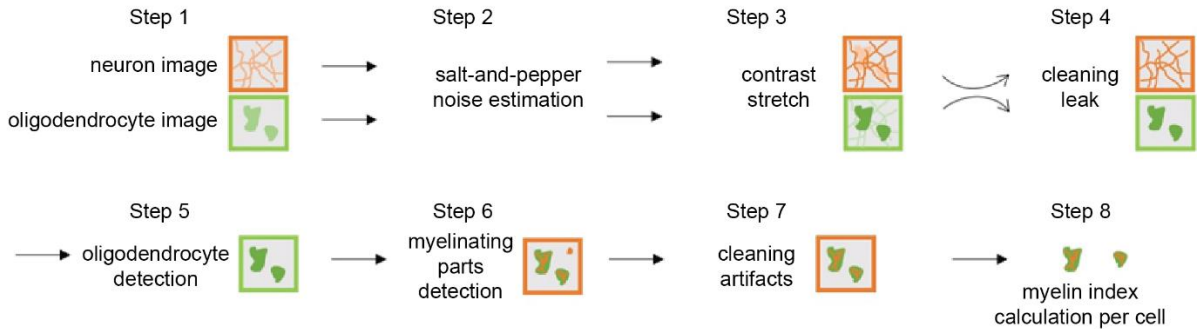

## Supplementary figure 1 Experimental workflow

Overall experimental workflow of measuring and quantifying myelination *in vitro*, including the isolation of primary rat OPCs and RGCs by immunopanning, co-culturing of OPCs and RGCs and miniaturising the co-cultures into 96-well plates for higher throughput imaging with Perkin Elmer's Operetta/ Opera Phenix. Finally, the principle steps of image processing allowing myelination index calculation per OL cell. Briefly, neuron and OL images are pre-processed, cells are detected, myelination parts are detected and myelin index is calculated. Details for each step are found in Methods.

|                               | Sigma Cat.   | Final ( $\mu\text{g/ml}$ ) |
|-------------------------------|--------------|----------------------------|
| <b>Aqueous stock</b>          |              |                            |
| L-Carnitine                   | C7518/C0283  | 2.0                        |
| Ethanolamine                  | E9508        | 1.0                        |
| D(+)-galactose                | G0625        | 15                         |
| Putrescine                    | P5780        | 16.1                       |
| Sodium Selenite               | S9133        | 0.01435                    |
| <b>Ethanollic stock</b>       |              |                            |
| Corticosterone                | C2505        | 0.02                       |
| Linoleic acid                 | L1012        | 1.0                        |
| Linolenic acid                | L2376        | 1.0                        |
| Lipoic acid (thioctic acid)   | T1395        | 0.047                      |
| Progesterone                  | P8783        | 0.0063                     |
| Retinyl acetate               | R7882        | 0.1                        |
| Retinol, all trans (vit. A)   | 95144        | 0.1                        |
| D,L-alpha-Tocopherol (vit. E) | 95240/T33251 | 1.0                        |
| D,L-alpha-Tocopherol acetate  | T3001        | 1.0                        |
| <b>Add fresh</b>              |              |                            |
| Albumin, bovine               | A4161        | 2500                       |
| Catalase                      | C40          | 2.5                        |
| Glutathione (reduced)         | G6013        | 1.0                        |
| Insulin                       | I6634        | 4.0                        |
| Superoxidase dismutase        | S5395        | 2.5                        |
| Transferrin                   | T5391        | 5.0                        |

## Supplementary table 1 Vitamin B27 recipe

Ingredients of vitamin B27 stock solution
